# Supplementary material
Source: Springer Nature journal article supplement (https://www.springermedizin.de/resource/supplementary/12967_2011_1006_MOESM1_ESM.pdf/9573562)

**Log<sub>10</sub> serum titer**

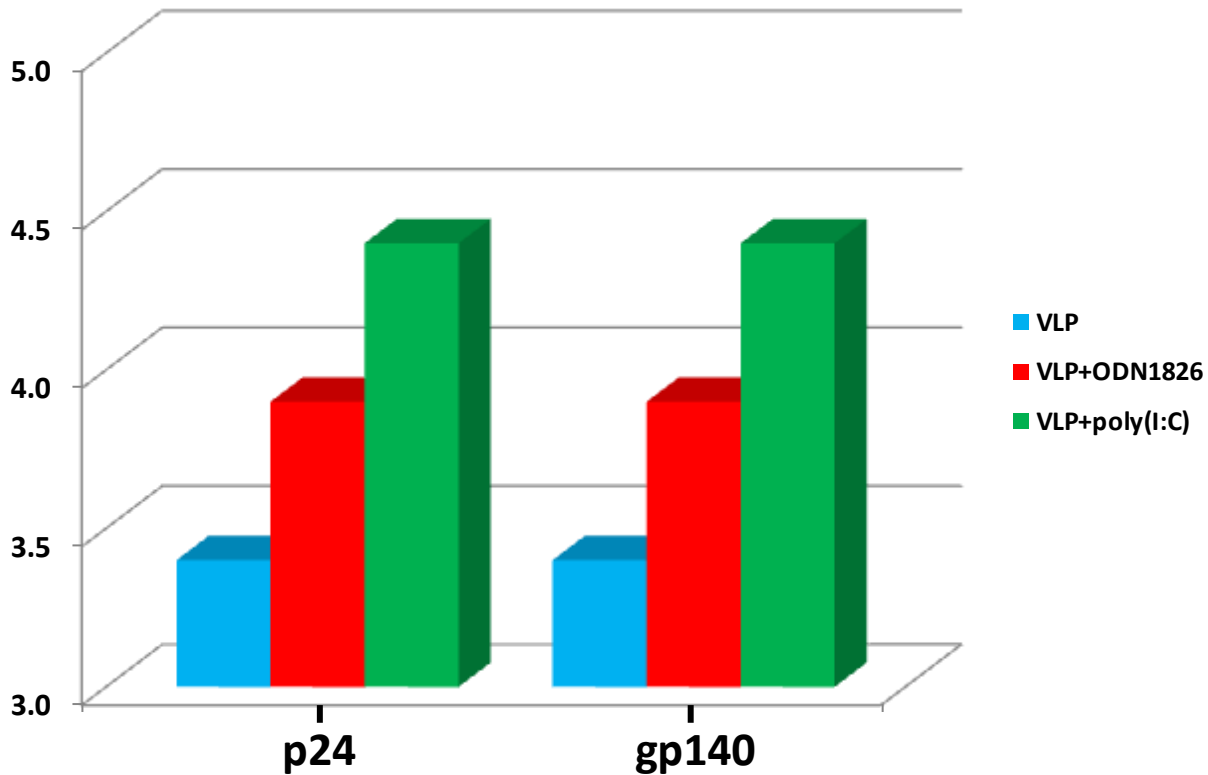

Supplement: MOESM1 [file 9573562]
